# Supplementary material for: Modulation of the Microenvironment Surrounding the Active Site of Penicillin G Acylase Immobilized on Acrylic Carriers Improves the Enzymatic Synthesis of Cephalosporins
Source: MDPI journal article supplement (doi:10.3390/molecules181114349), 2013-11-20

## Supplementary Materials

**Figure S1.** Percentage of conversion of *R*-(-)-mandelyl-7-ACA at increasing concentrations (5–50 mM) of 7-ACA.

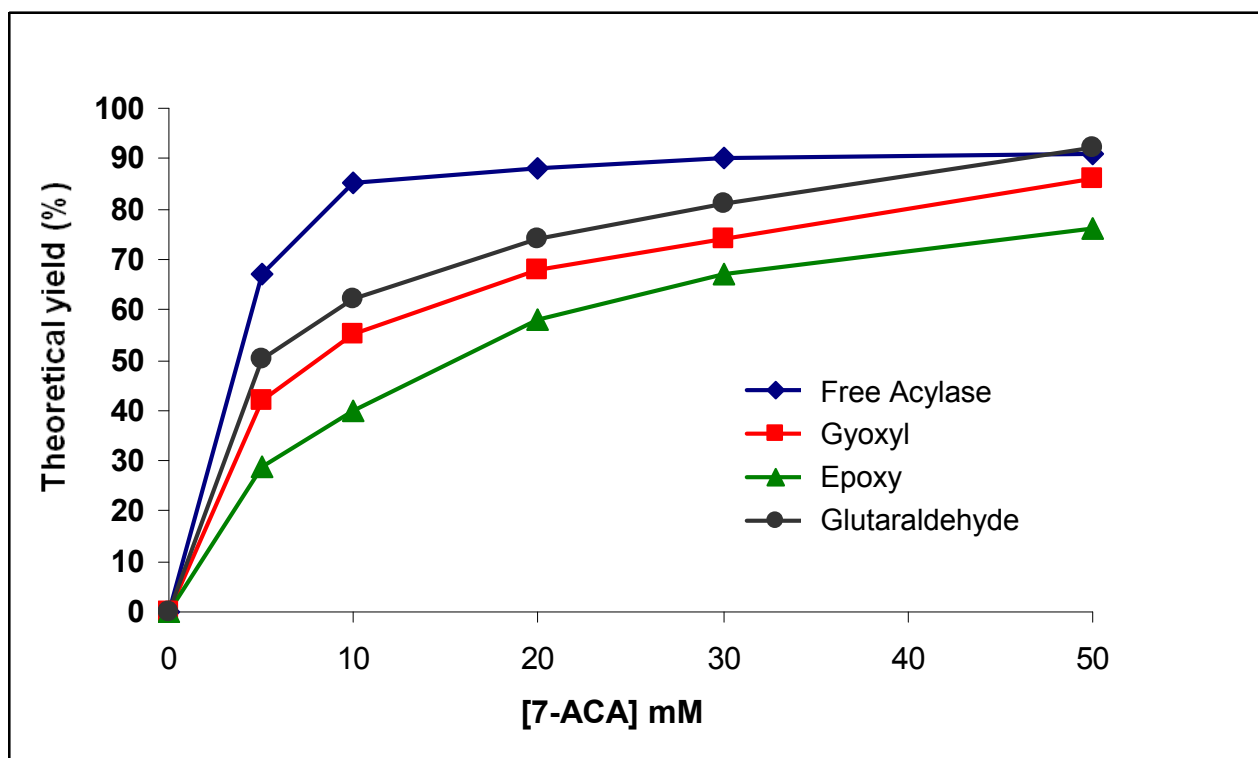

*Reaction conditions:* 4 °C, pH 6.5, *R*-(-)-methyl mandelic ester: 5 mM. *Legend:* non immobilized PGA (blue); PGA immobilized on glyoxyl agarose (red); PGA immobilized on epoxy acrylic supports (green); PGA immobilized on glutaraldehyde-activated acrylic support (black).

**Figure S2.** Stability of PGA immobilized on Eupergit<sup>®</sup> C before (blue) and after quenching with 1.5 M cysteine (red). Experimental conditions: 50 °C (panel A); MeOH 40% (v/v) (panel B).

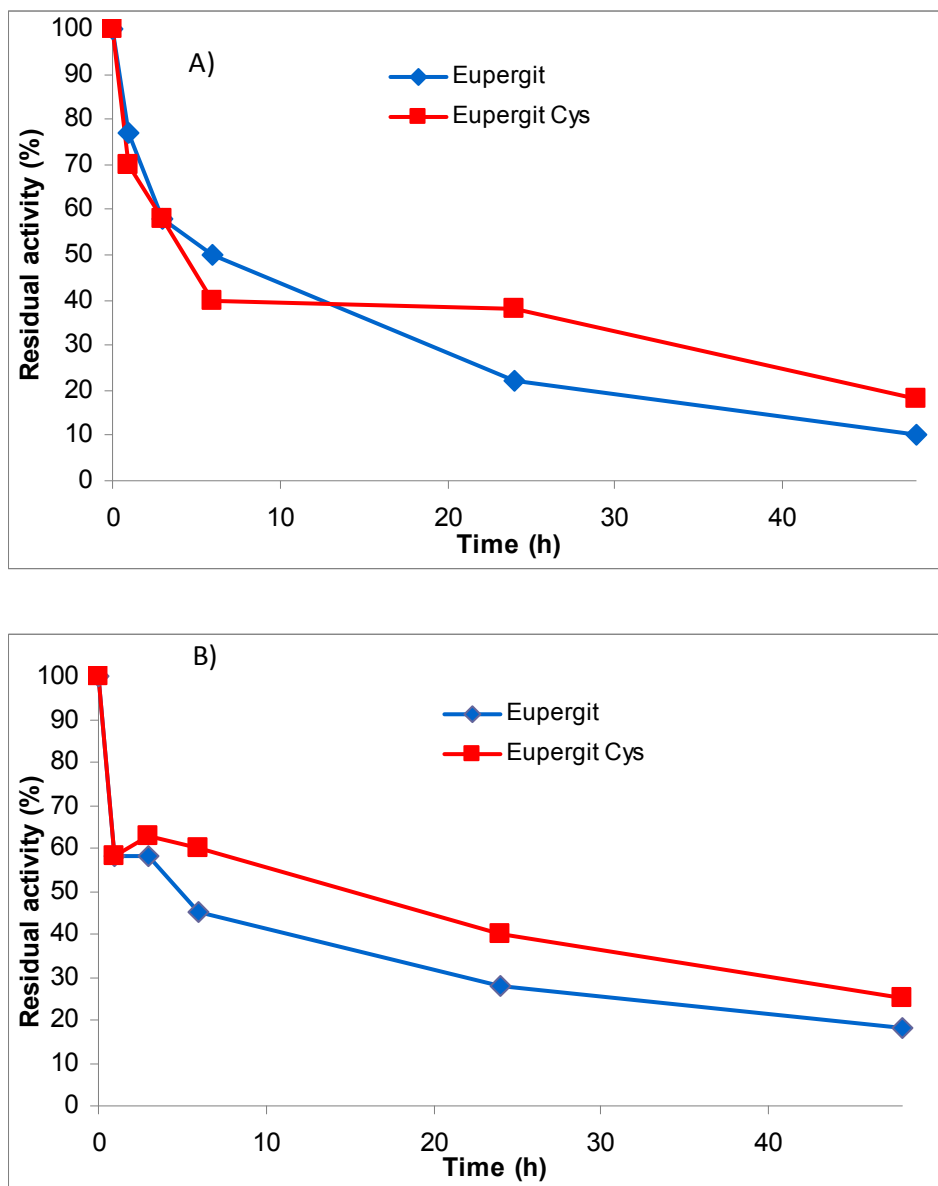

Supplement: s1 [file s1]
